# Supplementary material for: The ring-opening polymerization of ε-caprolactone and l-lactide using aluminum complexes bearing benzothiazole ligands as catalysts
Source: Royal Society of Chemistry journal article supplement (doi:10.1039/c6py00569a), 2016-01-01
Supplement: c6py00569a1.pdf [file c6py00569a1.pdf]

## Ring-opening Polymerization of $\epsilon$ -Caprolactone and L-Lactide by Using Aluminum Complexes Bearing Benzothiazole Ligands as Catalysts

Yen-Tzu Huang,<sup>a</sup> Wei-Chu Wang,<sup>a</sup> Chun-Pin Hsu,<sup>a</sup> Wei-Yi Lu,<sup>a</sup> Wan-Jung Chuang,<sup>a</sup>  
Michael Y. Chiang,<sup>ab</sup> Yi-Chun Lai,<sup>a</sup> Hsuan-Ying Chen\*<sup>a</sup>

<sup>a</sup> Department of Medicinal and Applied Chemistry, Kaohsiung Medical University, Kaohsiung, Taiwan, 80708, R.O.C.

<sup>b</sup> Department of Chemistry, National Sun Yat-sen University, Kaohsiung, Taiwan, 80424, R.O.C.

Table of Contents

|                                                                                                                              |      |
|------------------------------------------------------------------------------------------------------------------------------|------|
| <b>Table S1</b> Kinetic study of CL polymerization with various Al complexes in toluene<br>10 mL, [CL] = 1.0 M .....         | 2-4  |
| <b>Table S2</b> Kinetic study of LA polymerization with various Al complexes in toluene<br>10 mL, [LA] = 1.0 M at 80 °C..... | 5-7  |
| <b>Figure S1-S26</b> <sup>1</sup> H and <sup>13</sup> C NMR spectra of ligands and associated Al complexes .                 | 8-20 |
| <b>Figure S27</b> <sup>1</sup> H NMR spectrum of PCL (Table 1, entry 18).....                                                | 21   |
| <b>Figure S28</b> <sup>1</sup> H NMR spectrum of PLA (Table 2, entry 18).....                                                | 21   |

**Table S1** Kinetic study of CL polymerization with various Al complexes in toluene

10 mL, [CL] = 1.0 M at room temperature ([CL]:[Cat]:[BnOH]=100:1:3)

|                                                                          | LAlMe <sub>3</sub> L = |              |              |              |              |                |             |              |
|--------------------------------------------------------------------------|------------------------|--------------|--------------|--------------|--------------|----------------|-------------|--------------|
| time                                                                     | HPh                    | Hfur         | HBr          | HTh          | HMe          | H2OMe          | O           | S            |
| min                                                                      | Conv.(%)               |              |              |              |              |                |             |              |
| 5                                                                        |                        |              | 0.08         |              |              |                |             |              |
| 10                                                                       |                        |              | 0.2          |              | 0.39         |                | 0.28        |              |
| 15                                                                       | 0.3                    | 0.14         | 0.3          |              | 0.45         | 0.03           |             | 0.3          |
| 20                                                                       |                        |              |              | 0.27         | 0.5          |                | 0.51        |              |
| 25                                                                       |                        |              |              |              | 0.55         |                |             |              |
| 30                                                                       | 0.54                   | 0.32         | 0.58         |              |              | 0.14           | 0.66        | 0.47         |
| 40                                                                       |                        |              |              | 0.53         | 0.7          | 0.2            | 0.74        |              |
| 45                                                                       | 0.69                   | 0.44         |              |              |              |                |             | 0.57         |
| 50                                                                       |                        |              | 0.81         |              |              |                | 0.85        |              |
| 55                                                                       |                        |              |              | 0.7          |              | 0.27           |             |              |
| 60                                                                       | 0.8                    | 0.53         |              |              |              |                |             |              |
| 65                                                                       |                        |              |              | 0.78         |              |                |             |              |
| 70                                                                       | 0.85                   |              |              |              |              | 0.42           |             |              |
| 75                                                                       |                        | 0.64         |              | 0.84         |              |                |             | 0.82         |
| 90                                                                       |                        | 0.72         |              | 0.89         |              |                |             |              |
| 100                                                                      |                        |              |              | 0.93         |              |                |             |              |
| 120                                                                      |                        |              |              |              |              |                |             | 0.90         |
|                                                                          |                        |              |              |              |              |                |             |              |
| k <sub>obs</sub> ×<br>10 <sup>-2</sup> /<br>min <sup>-1</sup><br>(error) | 2.79<br>(2)            | 4.51<br>(13) | 3.52<br>(13) | 2.91<br>(10) | 2.37<br>(11) | 0.67 (3)       | 1.85<br>(4) | 3.77<br>(23) |
| I.P/<br>min                                                              | 2.40<br>(49)           | 2.9<br>(48)  | 3.88<br>(05) | 12.13        | 9.95         | 10.18<br>(243) | 0 (0)       | 1.54         |

|         |  |  |  |       |       |  |  |       |
|---------|--|--|--|-------|-------|--|--|-------|
| (error) |  |  |  | (252) | (117) |  |  | (202) |
|---------|--|--|--|-------|-------|--|--|-------|

|                                                       | LAlMe <sub>3</sub> L = |                               |                               |                               |                   |
|-------------------------------------------------------|------------------------|-------------------------------|-------------------------------|-------------------------------|-------------------|
| time                                                  | H <sup>NO2</sup>       | HNO <sub>2</sub> <sup>a</sup> | HNO <sub>2</sub> <sup>b</sup> | HNO <sub>2</sub> <sup>c</sup> | CINO <sub>2</sub> |
| min                                                   | Conv.(%)               |                               |                               |                               |                   |
| 3                                                     |                        |                               | 0.23                          | 0.29                          |                   |
| 5                                                     |                        | 0.19                          |                               |                               |                   |
| 6                                                     |                        |                               | 0.42                          | 0.48                          |                   |
| 9                                                     |                        |                               | 0.60                          | 0.65                          |                   |
| 10                                                    | 0.26                   | 0.40                          |                               |                               | 0.38              |
| 12                                                    |                        |                               | 0.7                           | 0.76                          |                   |
| 15                                                    |                        | 0.57                          | 0.78                          | 0.85                          |                   |
| 20                                                    | 0.51                   | 0.74                          | 0.86                          |                               | 0.71              |
| 25                                                    |                        | 0.80                          |                               |                               |                   |
| 30                                                    | 0.7                    | 0.85                          |                               |                               | 0.86              |
| 35                                                    |                        |                               |                               |                               | 0.90              |
| 40                                                    |                        |                               |                               |                               | 0.92              |
| 45                                                    | 0.85                   |                               |                               |                               |                   |
| 50                                                    | 0.9                    |                               |                               |                               |                   |
|                                                       |                        |                               |                               |                               |                   |
| k <sub>obs</sub> ×10 <sup>-2</sup> /min <sup>-1</sup> | 4.90                   | 6.99                          | 10.15                         | 12.43                         | 6.95              |
| (error)                                               | (22)                   | (31)                          | (24)                          | (46)                          | (28)              |
| I.P/ min                                              | 4.83                   | 2.19                          | 0                             | 1.43                          | 3.86              |
| (error)                                               | (158)                  | (87)                          |                               | (36)                          | (117)             |
|                                                       |                        |                               |                               |                               |                   |

<sup>a</sup>[CL]:[Cat]:[BnOH]=100:2:6, [CL]=1.0 M, toluene 10 mL

<sup>b</sup>[CL]:[Cat]:[BnOH]=100:3:9, [CL]=1.0 M, toluene 10 mL

<sup>c</sup>[CL]:[Cat]:[BnOH]=100:4:12, [CL]=1.0 M, toluene 10 mL

| time                                                    | <b>L<sup>4-OMe</sup> AlMe<sub>3</sub></b> | <b>L<sup>4-OMe</sup> AlEt<sub>3</sub></b> | <b>L<sup>4-OMe</sup> AlBu<sub>3</sub></b> |
|---------------------------------------------------------|-------------------------------------------|-------------------------------------------|-------------------------------------------|
| min                                                     | Conv.(%)                                  |                                           |                                           |
| 3                                                       |                                           | 0.08                                      |                                           |
| 6                                                       |                                           | 0.22                                      |                                           |
| 9                                                       |                                           | 0.35                                      |                                           |
| 10                                                      |                                           |                                           | 0.58                                      |
| 12                                                      |                                           | 0.49                                      |                                           |
| 15                                                      | 0.18                                      | 0.60                                      |                                           |
| 20                                                      |                                           |                                           | 0.72                                      |
| 30                                                      | 0.37                                      |                                           | 0.9                                       |
| 40                                                      | 0.51                                      |                                           | 0.95                                      |
| 55                                                      | 0.61                                      |                                           |                                           |
| 70                                                      | 0.75                                      |                                           |                                           |
|                                                         |                                           |                                           |                                           |
| <b>k<sub>obs</sub>×10<sup>-2</sup>/min<sup>-1</sup></b> | <b>2.12</b>                               | <b>6.97</b>                               | <b>7.41</b>                               |
| <b>(error)</b>                                          | <b>(14)</b>                               | <b>(36)</b>                               | <b>(81)</b>                               |
| <b>I.P/ min</b>                                         | <b>7.07(299)</b>                          | <b>2.20</b>                               | <b>0</b>                                  |
| <b>(error)</b>                                          |                                           | <b>(51)</b>                               |                                           |

**Table S2** Kinetic study of LA polymerization with various Al complexes in toluene  
 10 mL, [LA] = 1.0 M at 80 °C ([LA]:[Cat]:[BnOH]=100:1:3)

|                                                                          | LAlMe <sub>3</sub> L = |               |               |              |               |               |               |               |
|--------------------------------------------------------------------------|------------------------|---------------|---------------|--------------|---------------|---------------|---------------|---------------|
| time                                                                     | HPh                    | Hfur          | HBr           | HTh          | HMe           | H2OMe         | O             | S             |
| min                                                                      | Conv.(%)               |               |               |              |               |               |               |               |
| 10                                                                       |                        |               |               |              |               |               | 0.18          | 0.26          |
| 15                                                                       | 0.4                    | 0.30          | 0.27          | 0.50         | 0.26          | 0.20          |               |               |
| 20                                                                       |                        |               |               |              |               |               | 0.36          | 0.51          |
| 30                                                                       | 0.57                   | 0.64          | 0.54          | 0.70         | 0.58          | 0.49          | 0.47          | 0.72          |
| 40                                                                       | 0.69                   |               | 0.71          | 0.81         | 0.7           |               | 0.67          | 0.85          |
| 45                                                                       |                        | 0.78          |               |              |               | 0.64          |               |               |
| 50                                                                       | 0.78                   |               | 0.81          | 0.86         | 0.75          |               | 0.78          | 0.91          |
| 60                                                                       | 0.85                   | 0.88          | 0.86          | 0.91         |               | 0.76          |               |               |
| 65                                                                       |                        |               |               |              | 0.86          |               |               |               |
| 70                                                                       | 0.88                   |               |               |              |               | 0.81          |               |               |
| 75                                                                       |                        |               |               |              | 0.90          |               |               |               |
| 80                                                                       | 0.92                   | 0.93          |               |              |               |               |               |               |
|                                                                          |                        |               |               |              |               |               |               |               |
| k <sub>obs</sub> ×<br>10 <sup>-2</sup> /<br>min <sup>-1</sup><br>(error) | 3.41<br>(7)            | 3.55<br>(17)  | 3.79<br>(16)  | 3.80<br>(12) | 3.26<br>(11)  | 2.42<br>(13)  | 3.53<br>(31)  | 5.39<br>(19)  |
| I.P/<br>min<br>(error)                                                   | 5.89<br>(119)          | 2.74<br>(254) | 7.58<br>(181) | 3.21<br>(35) | 4.81<br>(183) | 3.84<br>(276) | 5.63<br>(297) | 5.57<br>(121) |

|                                                                  | LAlMe <sub>3</sub> L = |                               |                               |                               |                   |
|------------------------------------------------------------------|------------------------|-------------------------------|-------------------------------|-------------------------------|-------------------|
| time                                                             | HNO <sub>2</sub>       | HNO <sub>2</sub> <sup>a</sup> | HNO <sub>2</sub> <sup>b</sup> | HNO <sub>2</sub> <sup>c</sup> | CINO <sub>2</sub> |
| min                                                              | Conv.(%)               |                               |                               |                               |                   |
| 3                                                                |                        |                               | 0.20                          | 0.24                          |                   |
| 6                                                                |                        |                               |                               | 0.39                          |                   |
| 9                                                                |                        | 0.20                          |                               | 0.49                          |                   |
| 10                                                               |                        |                               |                               |                               | 0.13              |
| 12                                                               |                        | 0.30                          | 0.49                          | 0.56                          |                   |
| 15                                                               | 0.42                   | 0.37                          | 0.56                          | 0.65                          |                   |
| 20                                                               |                        | 0.46                          | 0.68                          |                               | 0.32              |
| 25                                                               |                        | 0.80                          |                               |                               |                   |
| 30                                                               | 0.65                   | 0.64                          | 0.82                          |                               | 0.47              |
| 35                                                               |                        |                               |                               |                               |                   |
| 40                                                               | 0.71                   | 0.75                          | 0.89                          |                               | 0.67              |
| 45                                                               |                        |                               |                               |                               |                   |
| 50                                                               | 0.78                   | 0.86                          |                               |                               | 0.78              |
| 60                                                               | 0.83                   |                               |                               |                               |                   |
| 65                                                               |                        |                               |                               |                               |                   |
| 70                                                               |                        |                               |                               |                               |                   |
| 75                                                               |                        |                               |                               |                               |                   |
| 80                                                               |                        |                               |                               |                               |                   |
|                                                                  |                        |                               |                               |                               |                   |
| k <sub>obs</sub> ×10 <sup>-2</sup> /min <sup>-1</sup><br>(error) | 3.02<br>(11)           | 3.73<br>(11)                  | 5.47<br>(10)                  | 6.26<br>(24)                  | 3.47<br>(29)      |
| I.P/ min<br>(error)                                              | 0                      | 2.83<br>(55)                  | 0                             | 0                             | 8.21<br>(277)     |
|                                                                  |                        |                               |                               |                               |                   |

<sup>a</sup>[CL]:[Cat]:[BnOH]=100:2:6, [LA]=1.0 M, toluene 10 mL

<sup>b</sup>[CL]:[Cat]:[BnOH]=100:3:9, [LA]=1.0 M, toluene 10 mL

<sup>c</sup>[CL]:[Cat]:[BnOH]=100:4:12, [LA]=1.0 M, toluene 10 mL

| time                                              | <b>L<sup>4-OMe</sup> AlMe<sub>3</sub></b> | <b>L<sup>4-OMe</sup> AlEt<sub>3</sub></b> | <b>L<sup>4-OMe</sup> AlBu<sub>3</sub></b> |
|---------------------------------------------------|-------------------------------------------|-------------------------------------------|-------------------------------------------|
| min                                               | Conv.(%)                                  |                                           |                                           |
| 10                                                |                                           |                                           | 0.05                                      |
| 15                                                | 0.19                                      | 0.30                                      |                                           |
| 20                                                |                                           |                                           | 0.16                                      |
| 30                                                | 0.43                                      | 0.64                                      | 0.26                                      |
| 40                                                |                                           | 0.78                                      | 0.32                                      |
| 45                                                | 0.65                                      |                                           |                                           |
| 50                                                |                                           | 0.87                                      | 0.41                                      |
| 55                                                |                                           |                                           |                                           |
| 60                                                | 0.77                                      |                                           |                                           |
| 70                                                | 0.82                                      | 0.93                                      |                                           |
| 80                                                |                                           |                                           | 0.65                                      |
| 110                                               |                                           |                                           | 0.77                                      |
| $k_{\text{obs}} \times 10^{-2} / \text{min}^{-1}$ | 2.80                                      | 4.15                                      | 1.44                                      |
| (error)                                           | (7)                                       | (13)                                      | (5)                                       |
| I.P/ min                                          | 8.24                                      | 5.47                                      | 9.67                                      |
| (error)                                           | (1.36)                                    | (139)                                     | (210)                                     |

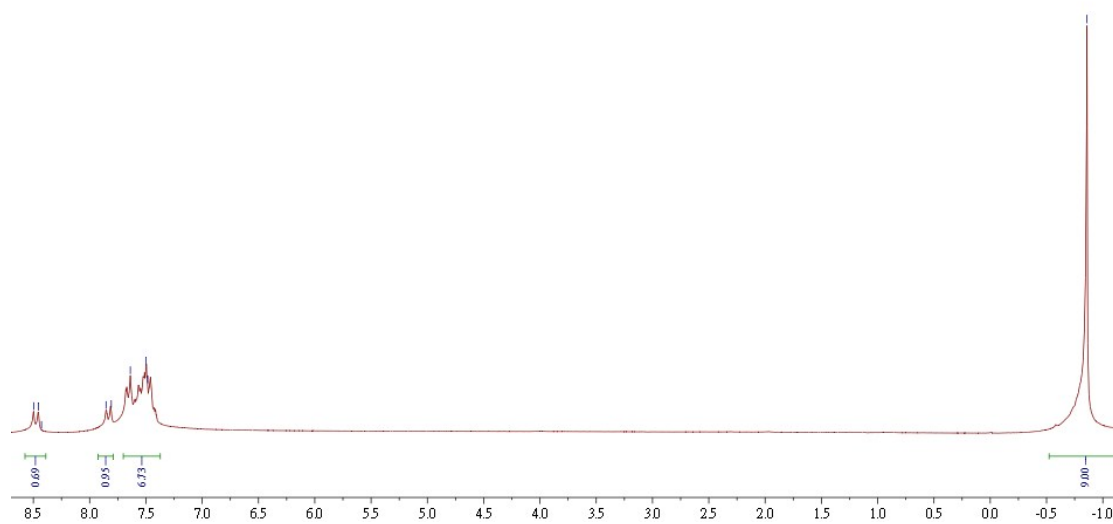

Figure S1  $^1\text{H}$  NMR spectrum of  $\text{L}^{\text{HPh}}\text{AlMe}_3$  in  $\text{CDCl}_3$

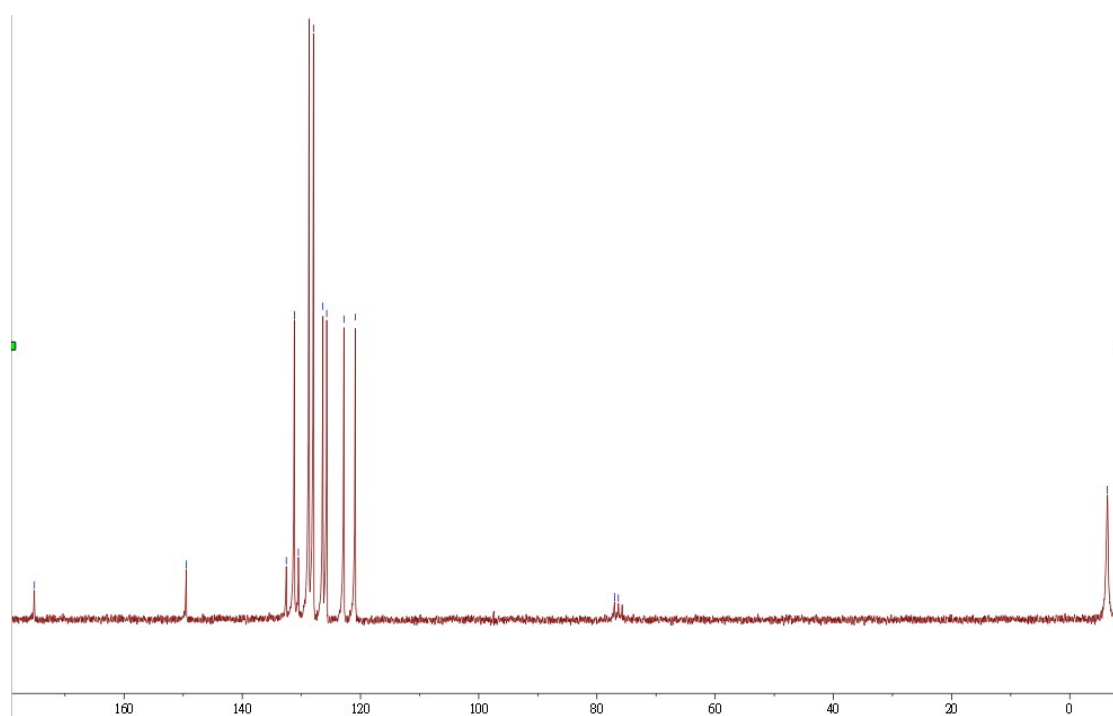

Figure S2  $^{13}\text{C}$  NMR spectrum of  $\text{L}^{\text{HPh}}\text{AlMe}_3$  in  $\text{CDCl}_3$



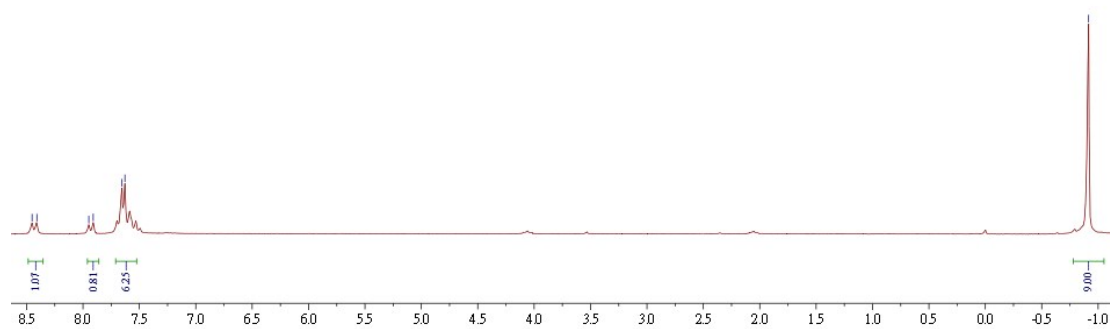

Figure S3  $^1\text{H}$  NMR spectrum of  $\text{L}^{\text{HBr}}\text{AlMe}_3$  in  $\text{CDCl}_3$

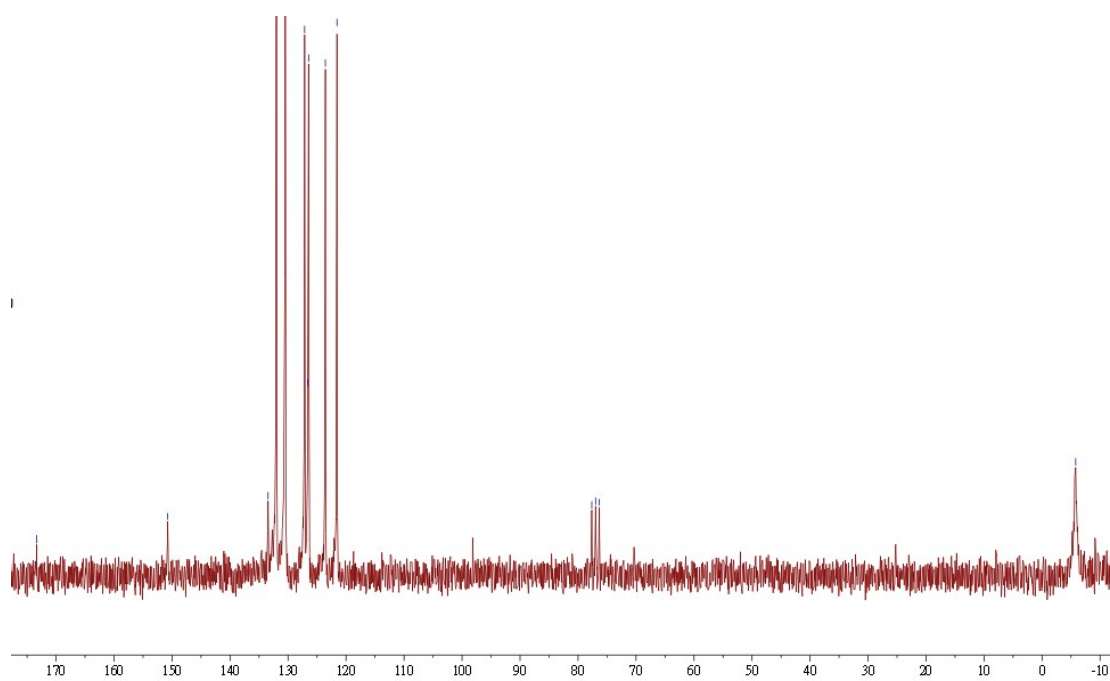

Figure S4  $^{13}\text{C}$  NMR spectrum of  $\text{L}^{\text{HBr}}\text{AlMe}_3$  in  $\text{CDCl}_3$

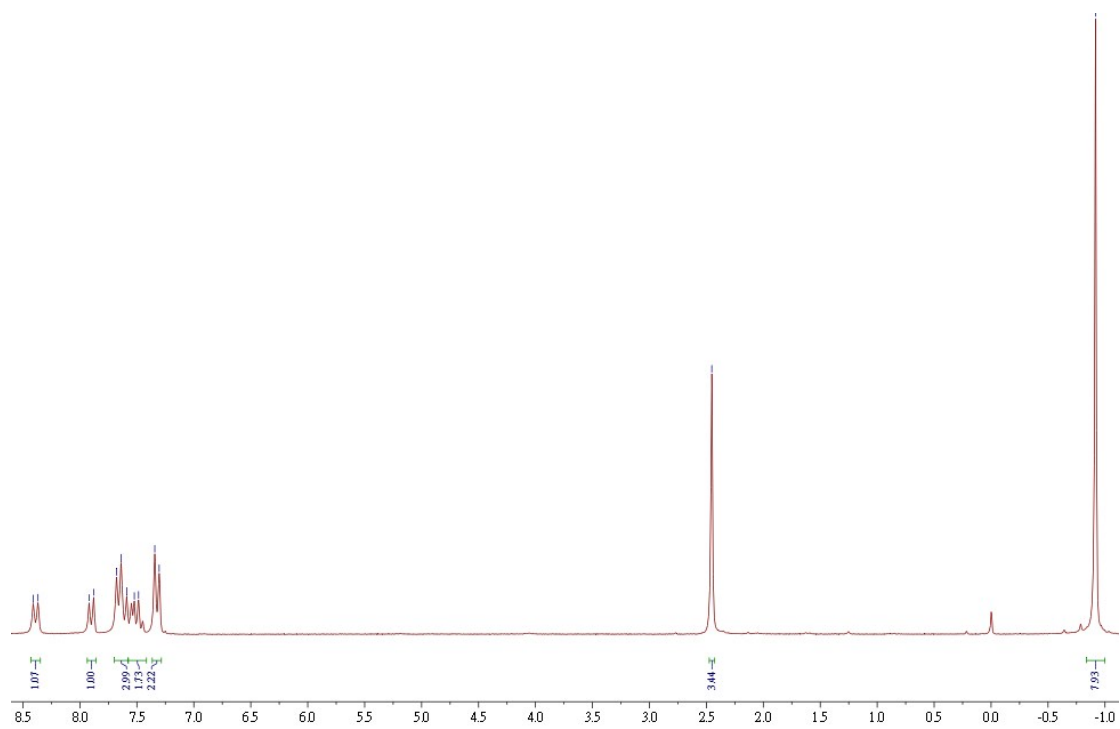

Figure S5  $^1\text{H}$  NMR spectrum of  $\text{L}^{\text{HMe}}\text{AlMe}_3$  in  $\text{CDCl}_3$

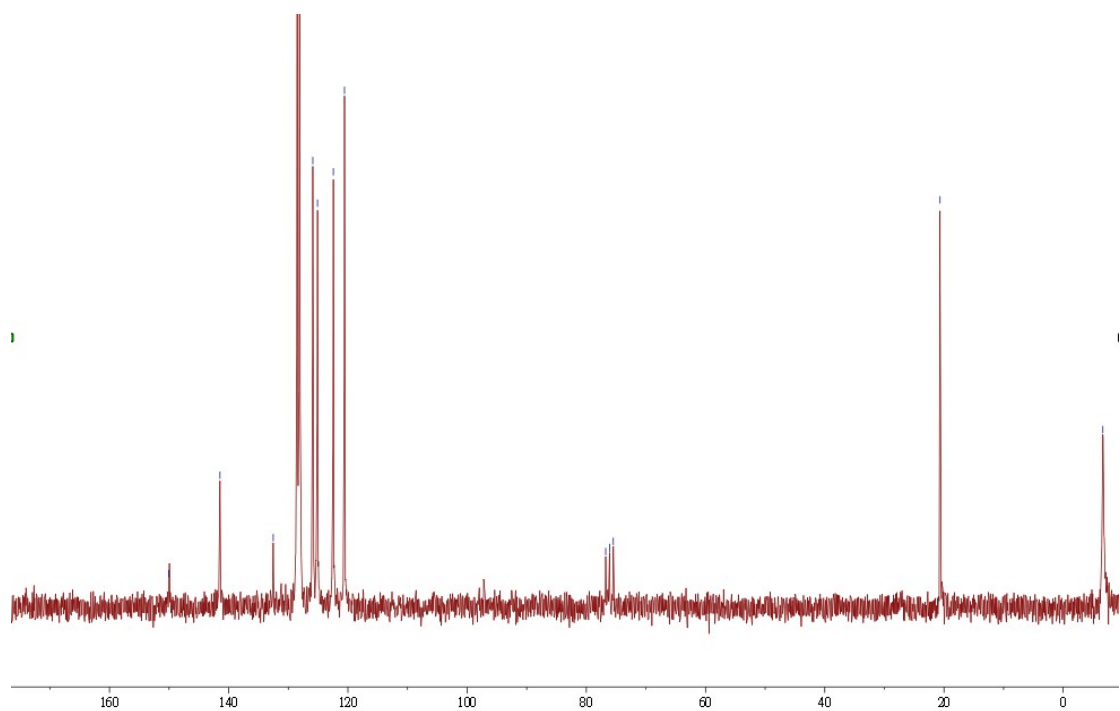

Figure S6  $^{13}\text{C}$  NMR spectrum of  $\text{L}^{\text{HMe}}\text{AlMe}_3$  in  $\text{CDCl}_3$

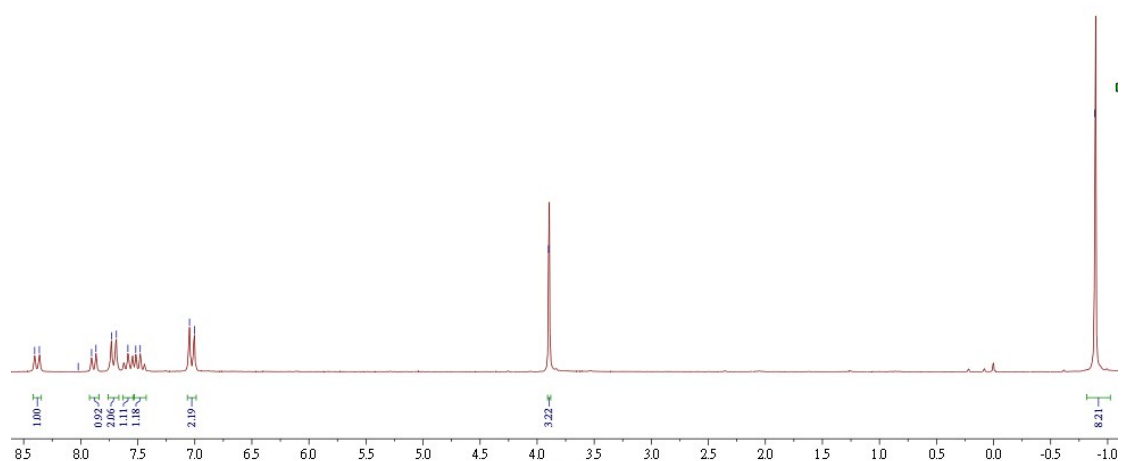

Figure S7  $^1\text{H}$  NMR spectrum of  $\text{L}^{\text{H4OMeAlMe}_3}$  in  $\text{CDCl}_3$

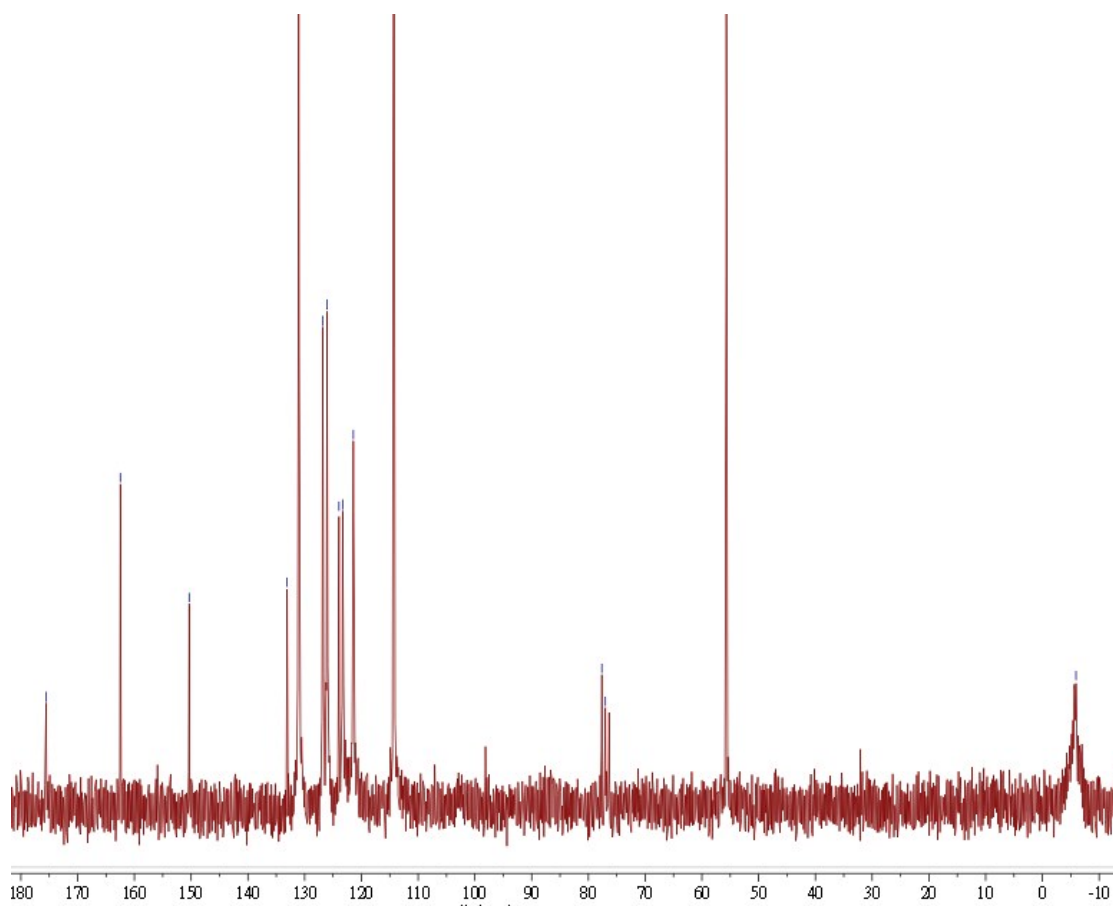

Figure S8  $^{13}\text{C}$  NMR spectrum of  $\text{L}^{\text{H4OMeAlMe}_3}$  in  $\text{CDCl}_3$

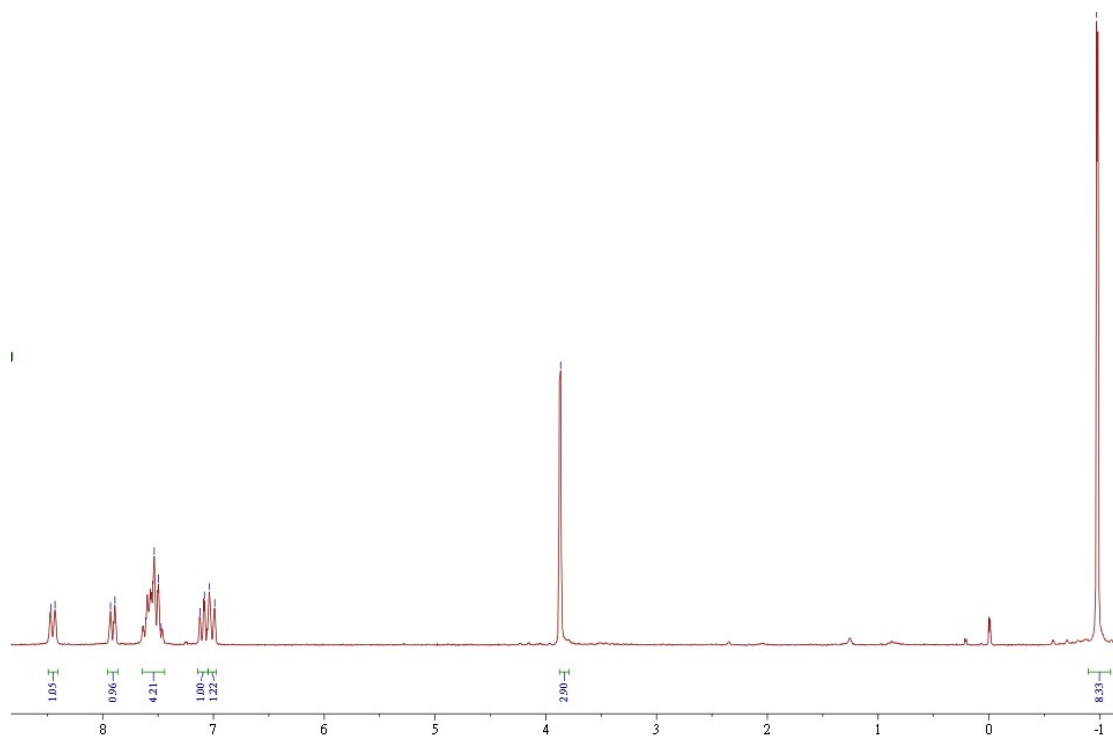

Figure S9  $^1\text{H}$  NMR spectrum of  $\text{L}^{\text{H2OMeAlMe}_3}$  in  $\text{CDCl}_3$

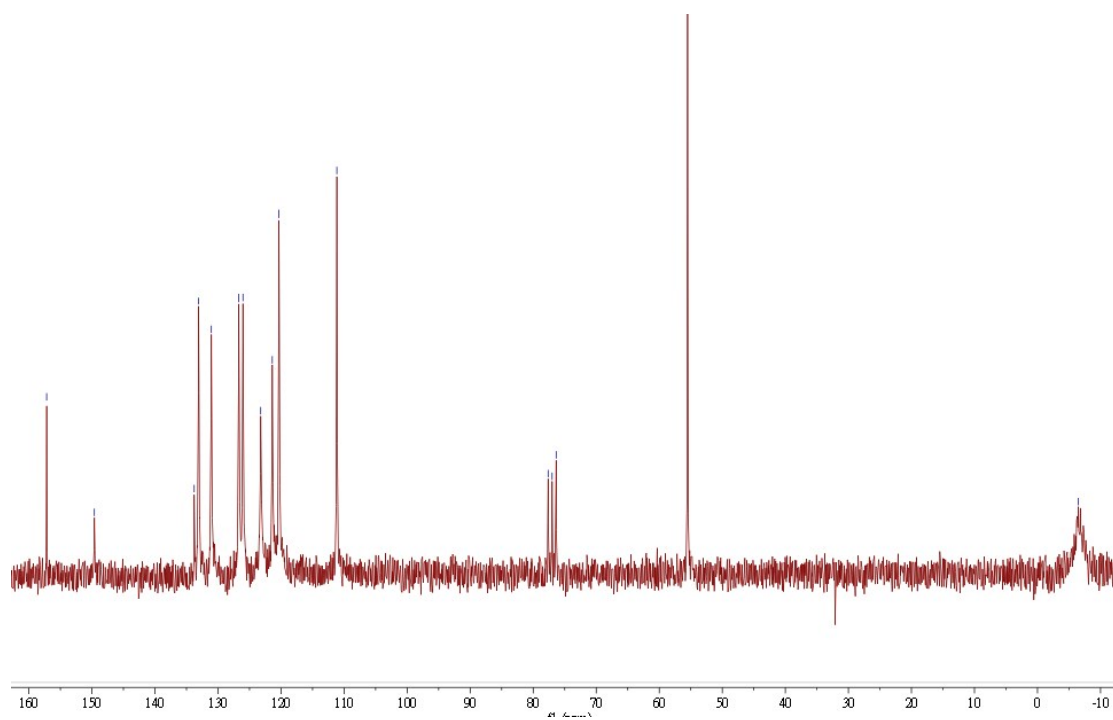

Figure S10  $^{13}\text{C}$  NMR spectrum of  $\text{L}^{\text{H2OMeAlMe}_3}$  in  $\text{CDCl}_3$

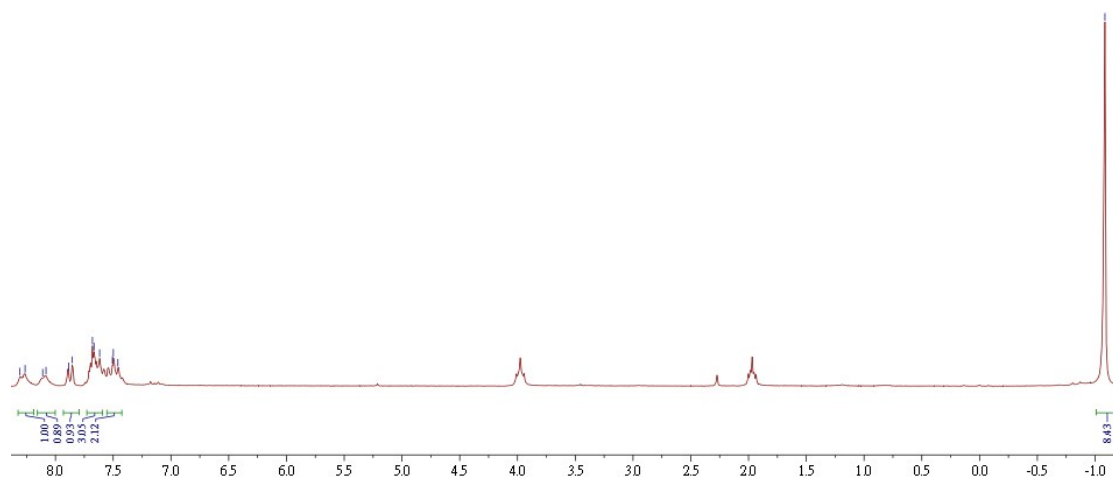

Figure S11  $^1\text{H}$  NMR spectrum of  $\text{L}^{\text{HNO}_2}\text{AlMe}_3$  in  $\text{CDCl}_3$

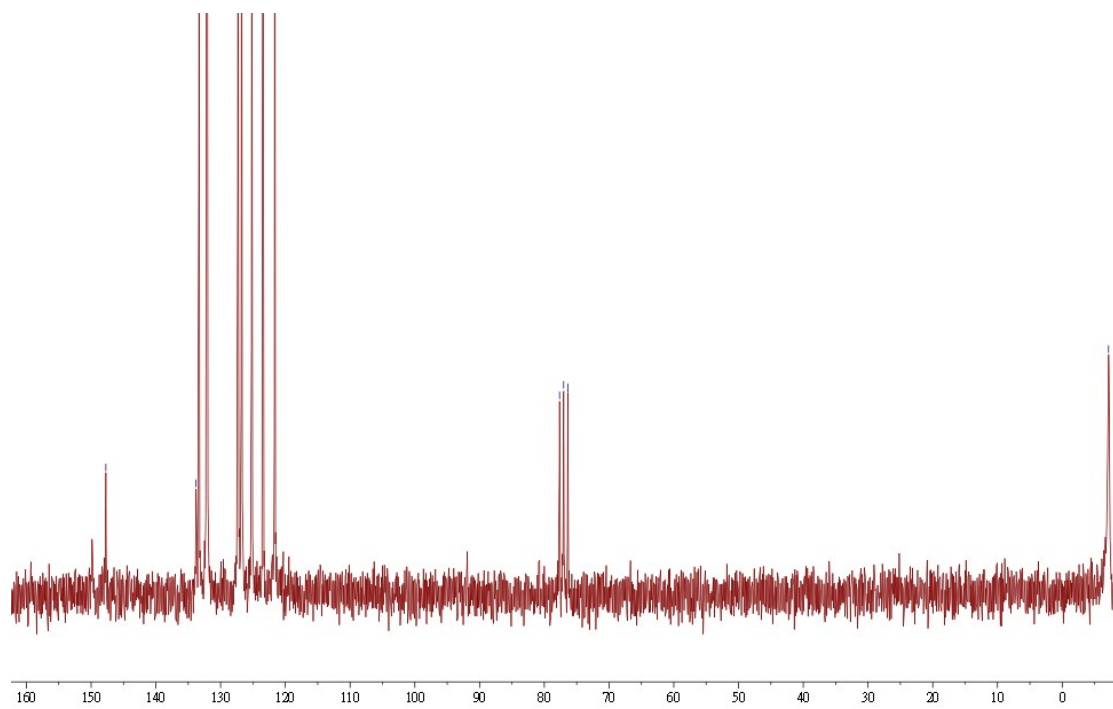

Figure S12  $^{13}\text{C}$  NMR spectrum of  $\text{L}^{\text{HNO}_2}\text{AlMe}_3$  in  $\text{CDCl}_3$

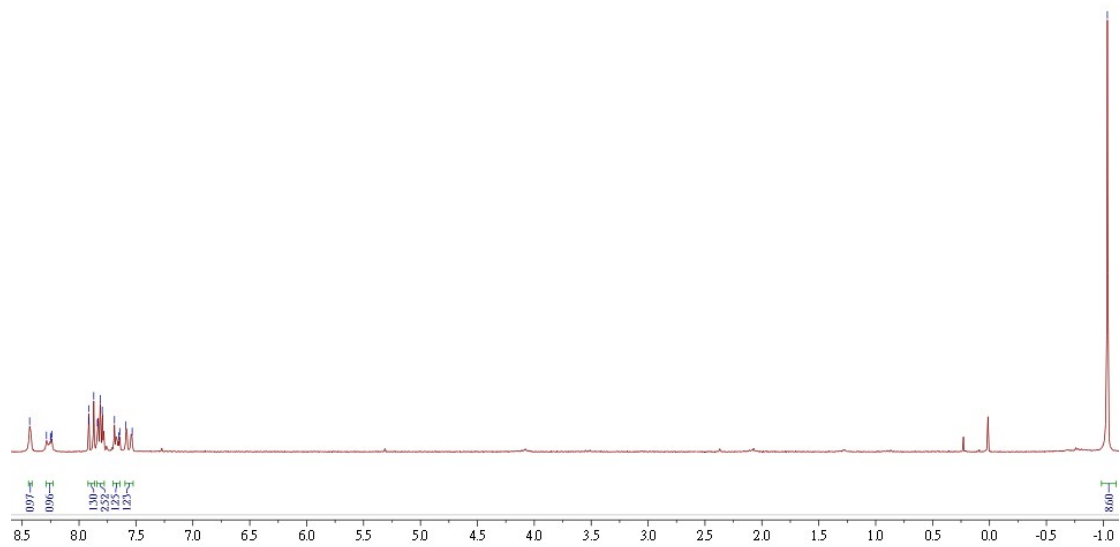

Figure S13  $^1\text{H}$  NMR spectrum of  $\text{L}^{\text{CINO}_2}\text{AlMe}_3$  in  $\text{CDCl}_3$

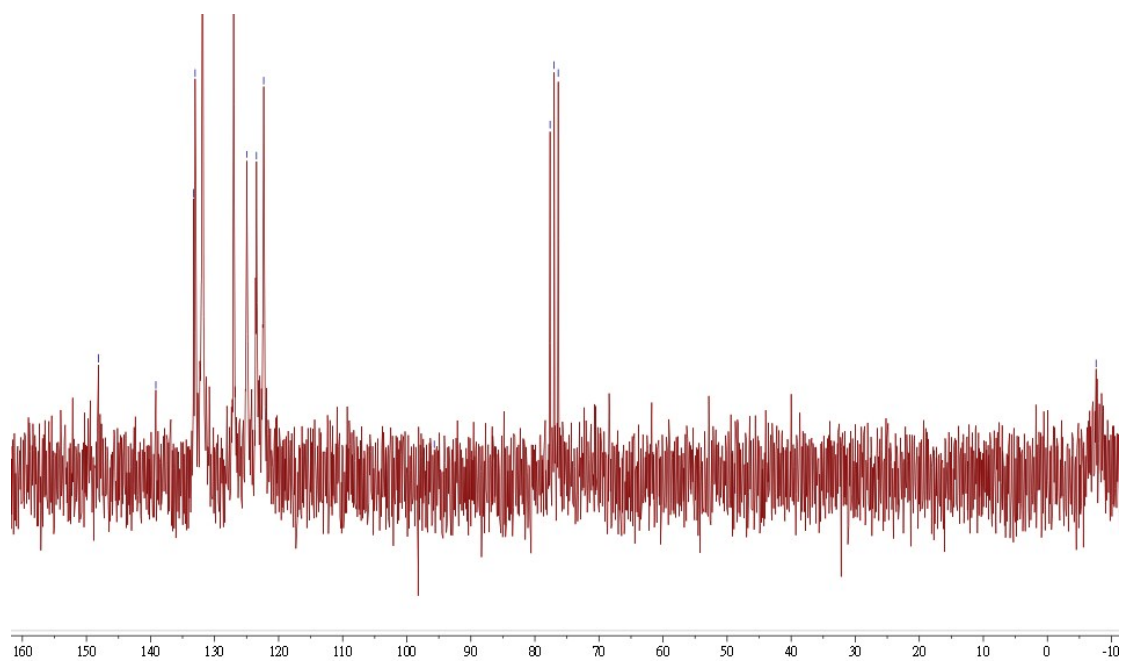

Figure S14  $^{13}\text{C}$  NMR spectrum of  $\text{L}^{\text{CINO}_2}\text{AlMe}_3$  in  $\text{CDCl}_3$

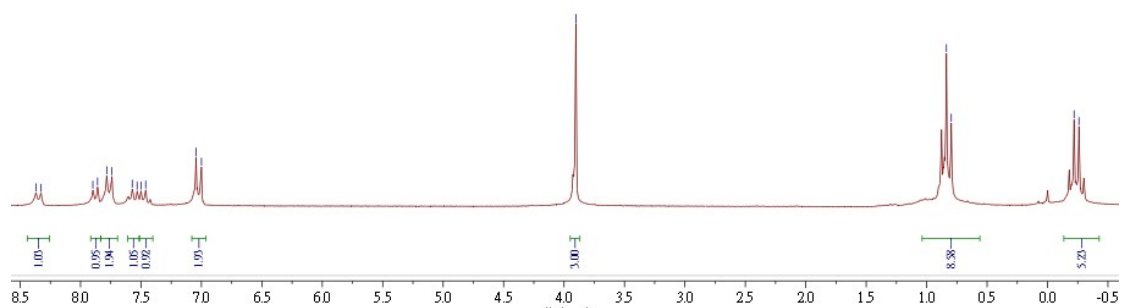

Figure S15  $^1\text{H}$  NMR spectrum of  $\text{L}^{\text{H4OMe}}\text{AlEt}_3$  in  $\text{CDCl}_3$

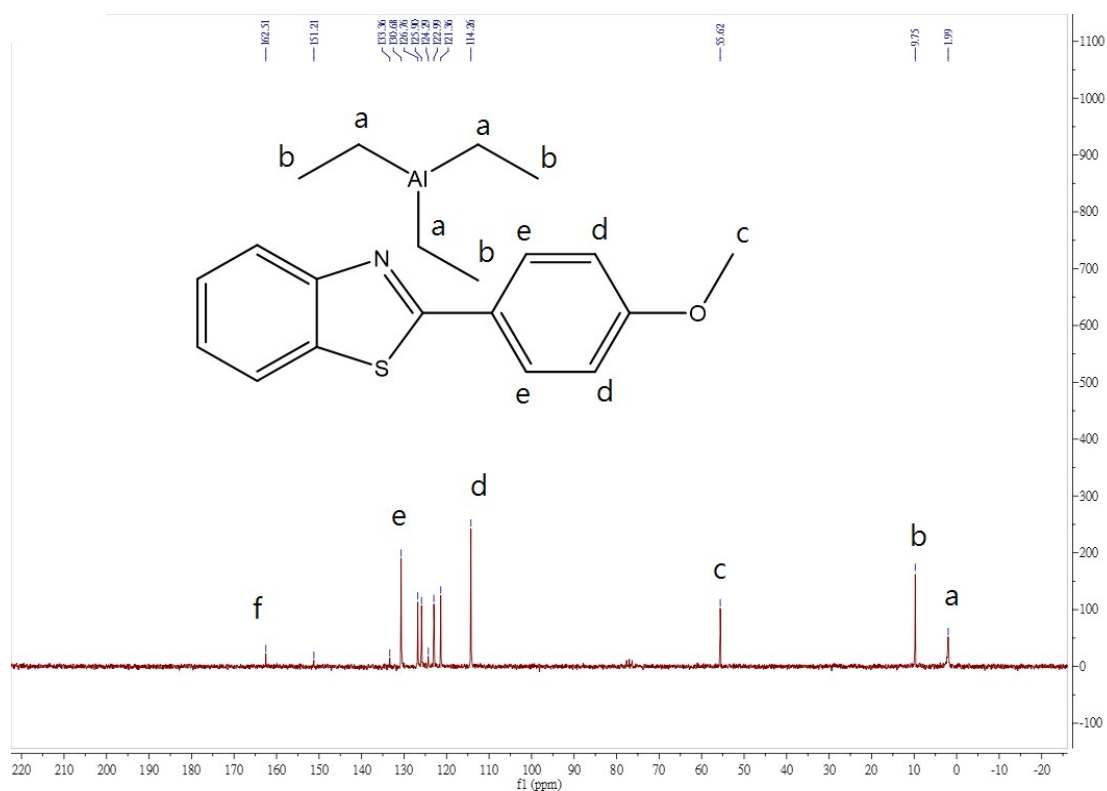

Figure S16  $^{13}\text{C}$  NMR spectrum of  $\text{L}^{\text{H4OMe}}\text{AlEt}_3$  in  $\text{CDCl}_3$

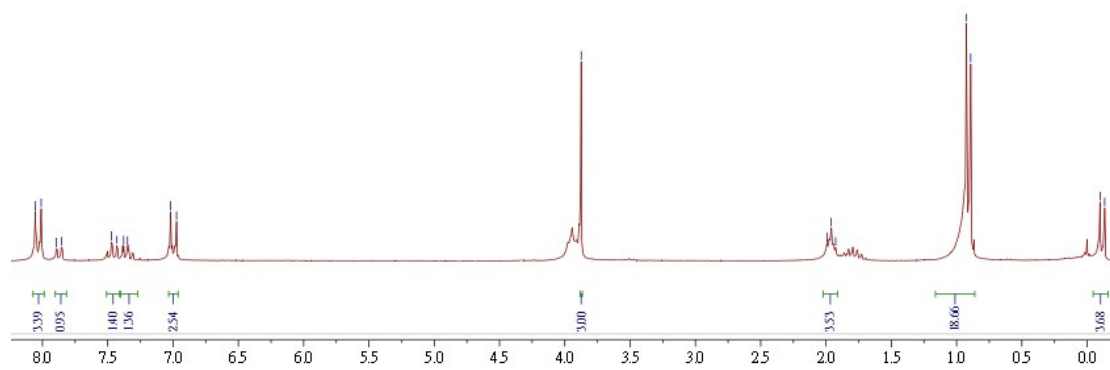

Figure S17  $^1\text{H}$  NMR spectrum of  $\text{L}^{\text{H4OMe}}\text{AlBu}_3$  in  $\text{CDCl}_3$

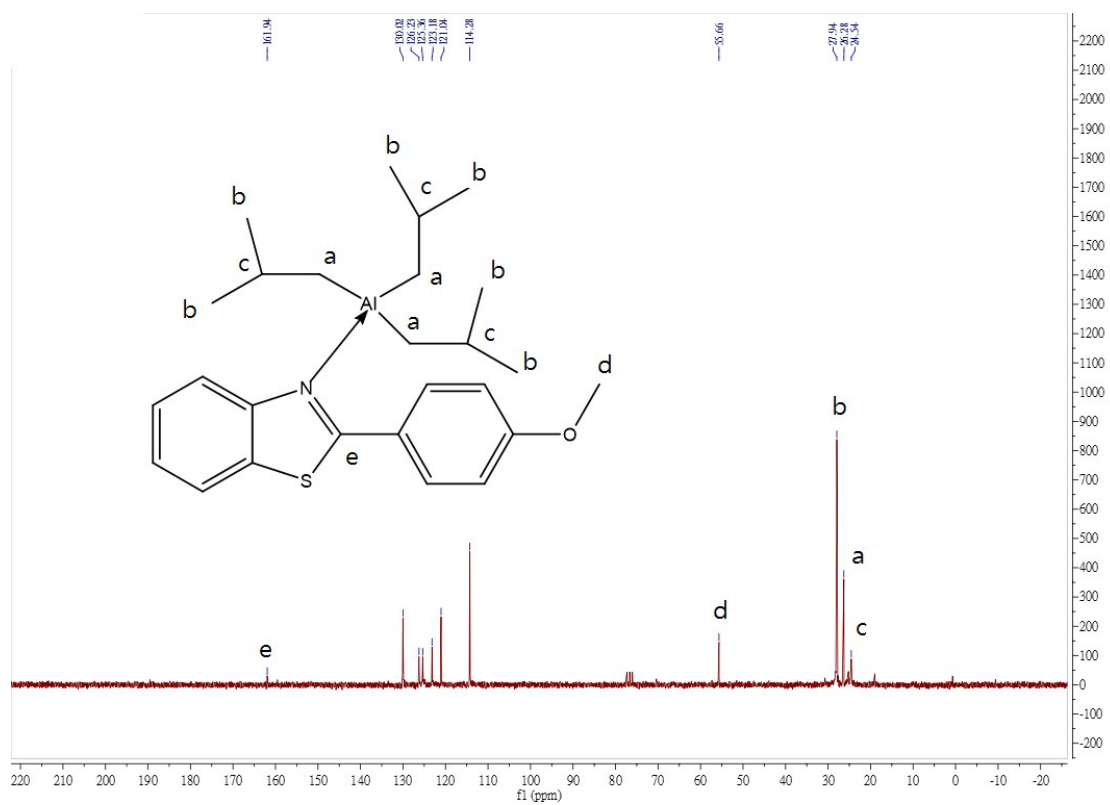

Figure S18  $^{13}\text{C}$  NMR spectrum of  $\text{L}^{\text{H4OMe}}\text{AlBu}_3$  in  $\text{CDCl}_3$



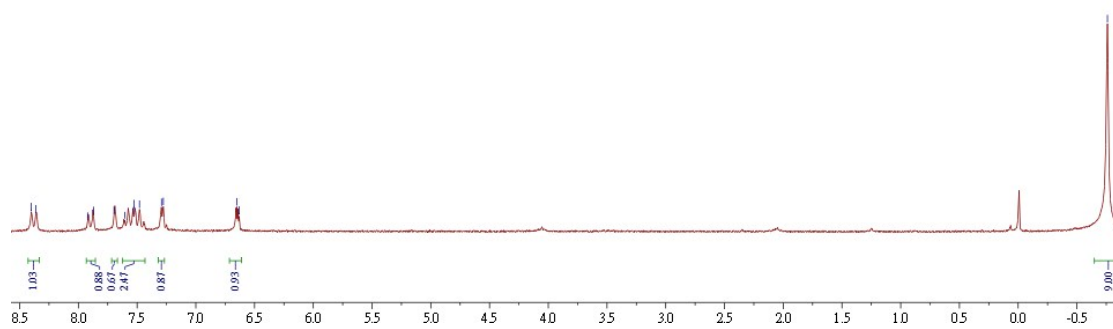

Figure S19  $^1\text{H}$  NMR spectrum of  $\text{L}^{\text{HFu}}\text{AlMe}_3$  in  $\text{CDCl}_3$

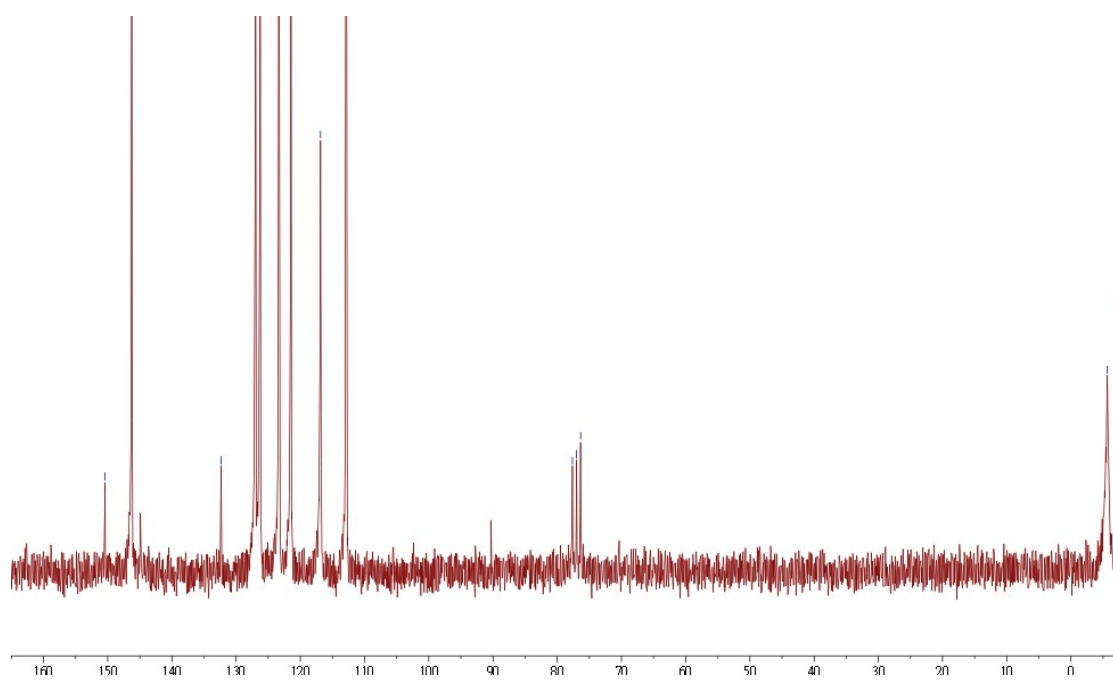

Figure S20  $^{13}\text{C}$  NMR spectrum of  $\text{L}^{\text{HFu}}\text{AlMe}_3$  in  $\text{CDCl}_3$

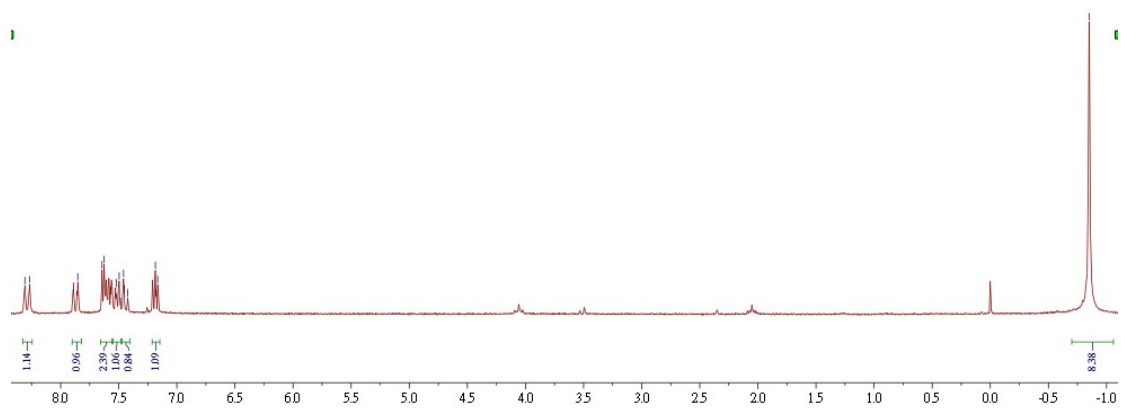

Figure S21  $^1\text{H}$  NMR spectrum of  $\text{L}^{\text{HTh}}\text{AlMe}_3$  in  $\text{CDCl}_3$

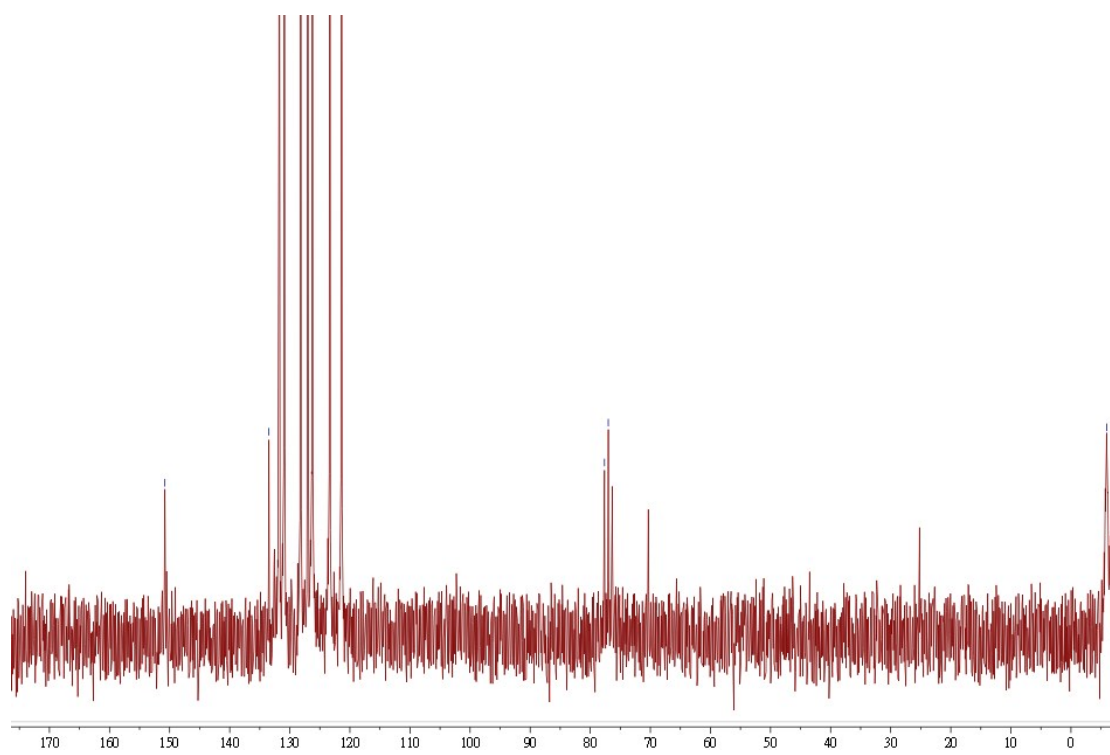

Figure S22  $^{13}\text{C}$  NMR spectrum of  $\text{L}^{\text{HTh}}\text{AlMe}_3$  in  $\text{CDCl}_3$

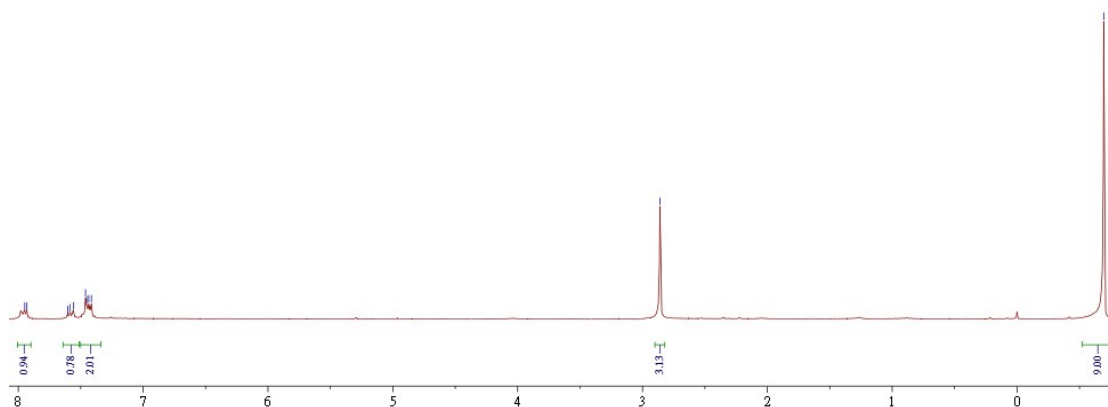

Figure S23  $^1\text{H}$  NMR spectrum of  $\text{L}^0\text{AlMe}_3$  in  $\text{CDCl}_3$

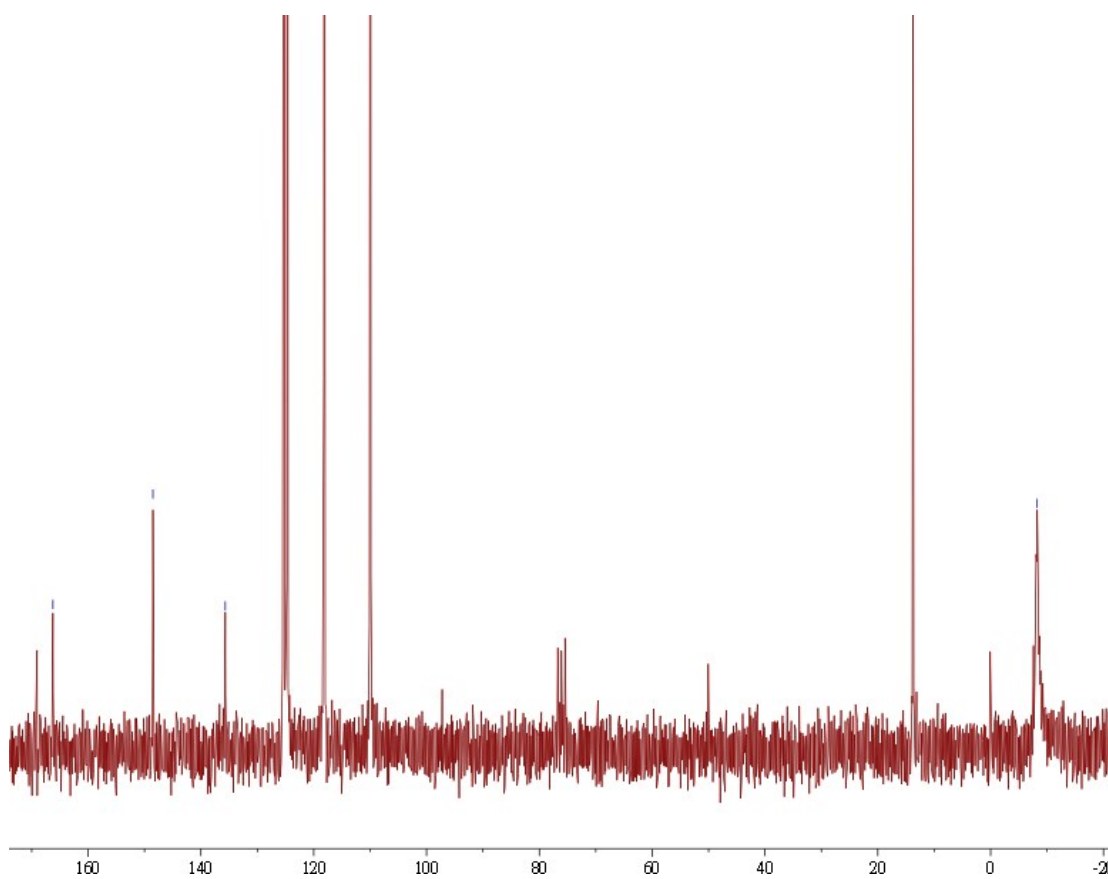

Figure S24  $^{13}\text{C}$  NMR spectrum of  $\text{L}^0\text{AlMe}_3$  in  $\text{CDCl}_3$

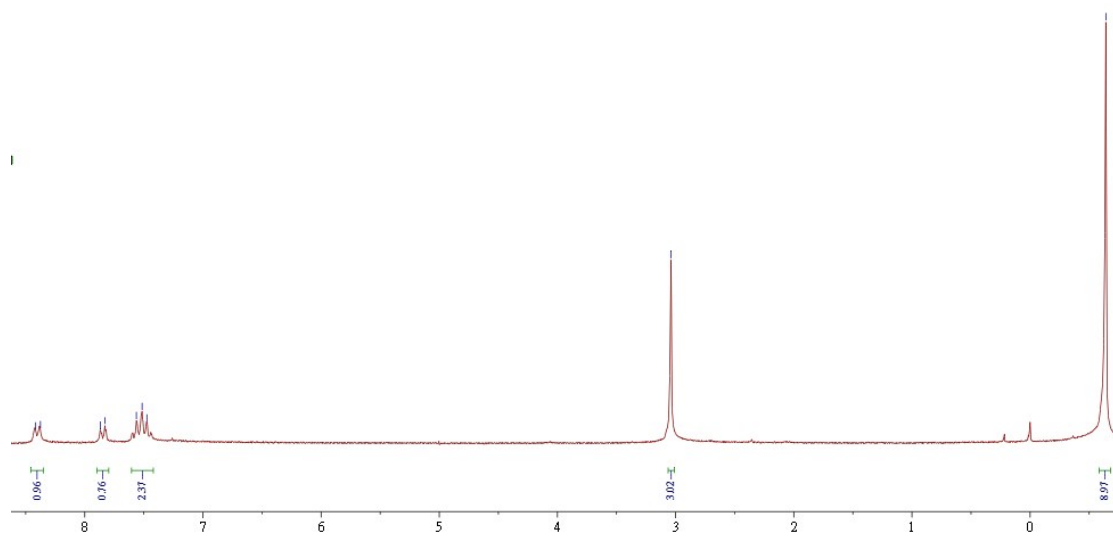

Figure S25  $^1\text{H}$  NMR spectrum of  $\text{L}^{\text{S}}\text{AlMe}_3$  in  $\text{CDCl}_3$

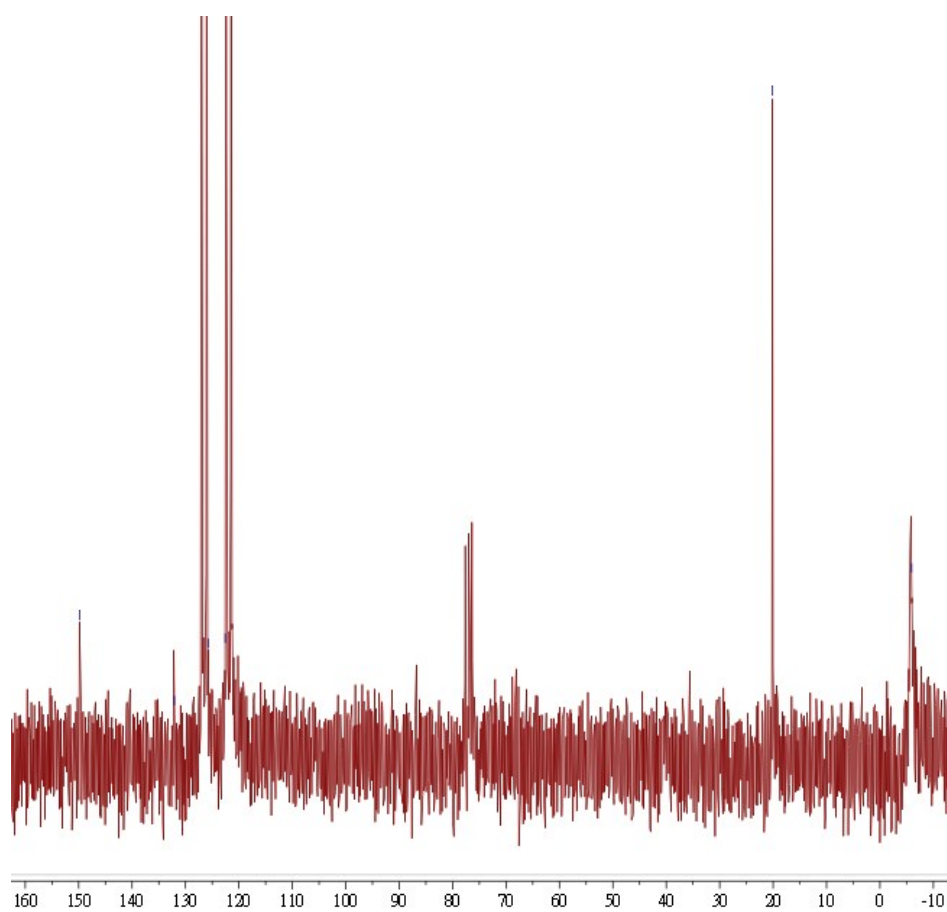

Figure S26  $^{13}\text{C}$  NMR spectrum of  $\text{L}^{\text{S}}\text{AlMe}_3$  in  $\text{CDCl}_3$

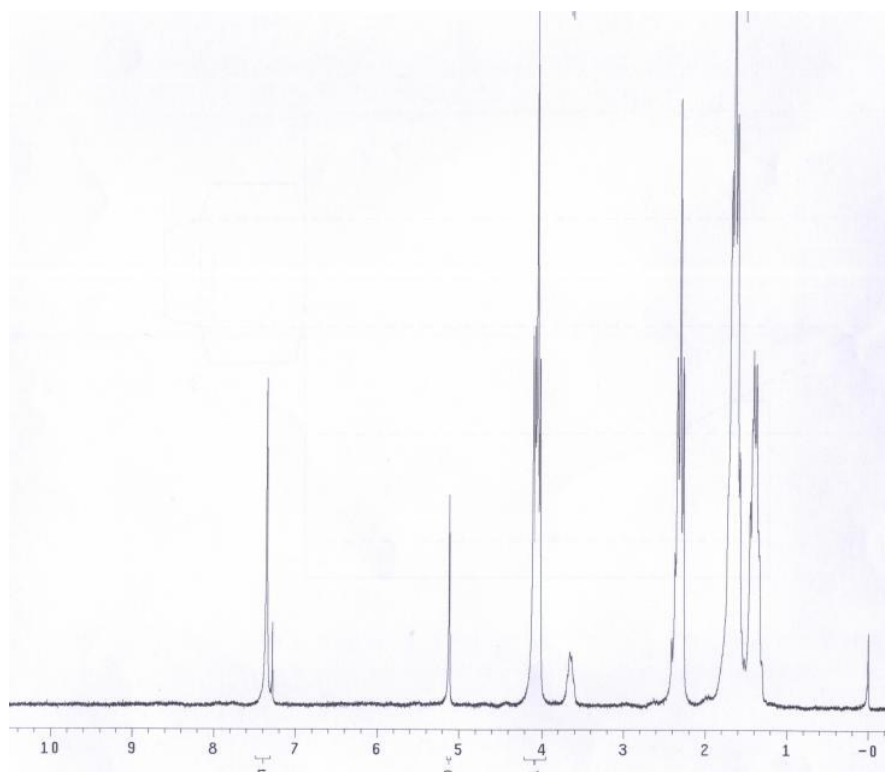

**Figure S27** <sup>1</sup>H NMR spectrum of PCL (Table 1, entry 18)

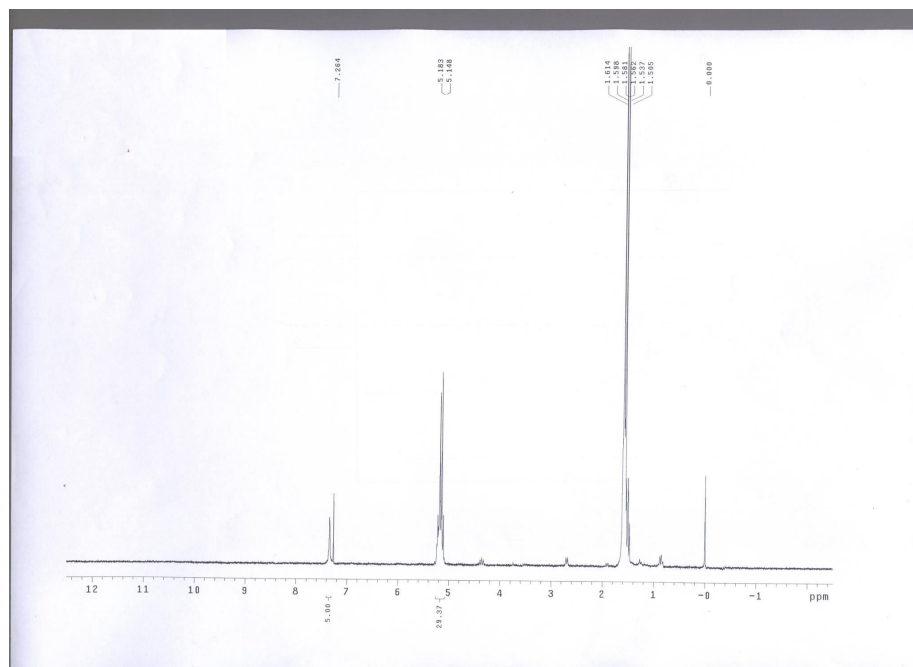

**Figure S28** <sup>1</sup>H NMR spectrum of PLA (Table 2, entry 18)
